# Supplementary material
Source: bioRxiv or medRxiv preprint supplement (https://www.biorxiv.org/highwire/filestream/91241/field_highwire_adjunct_files/0/295915-1.pdf)
Supplement: Supplementary file [file 295915-1.pdf]

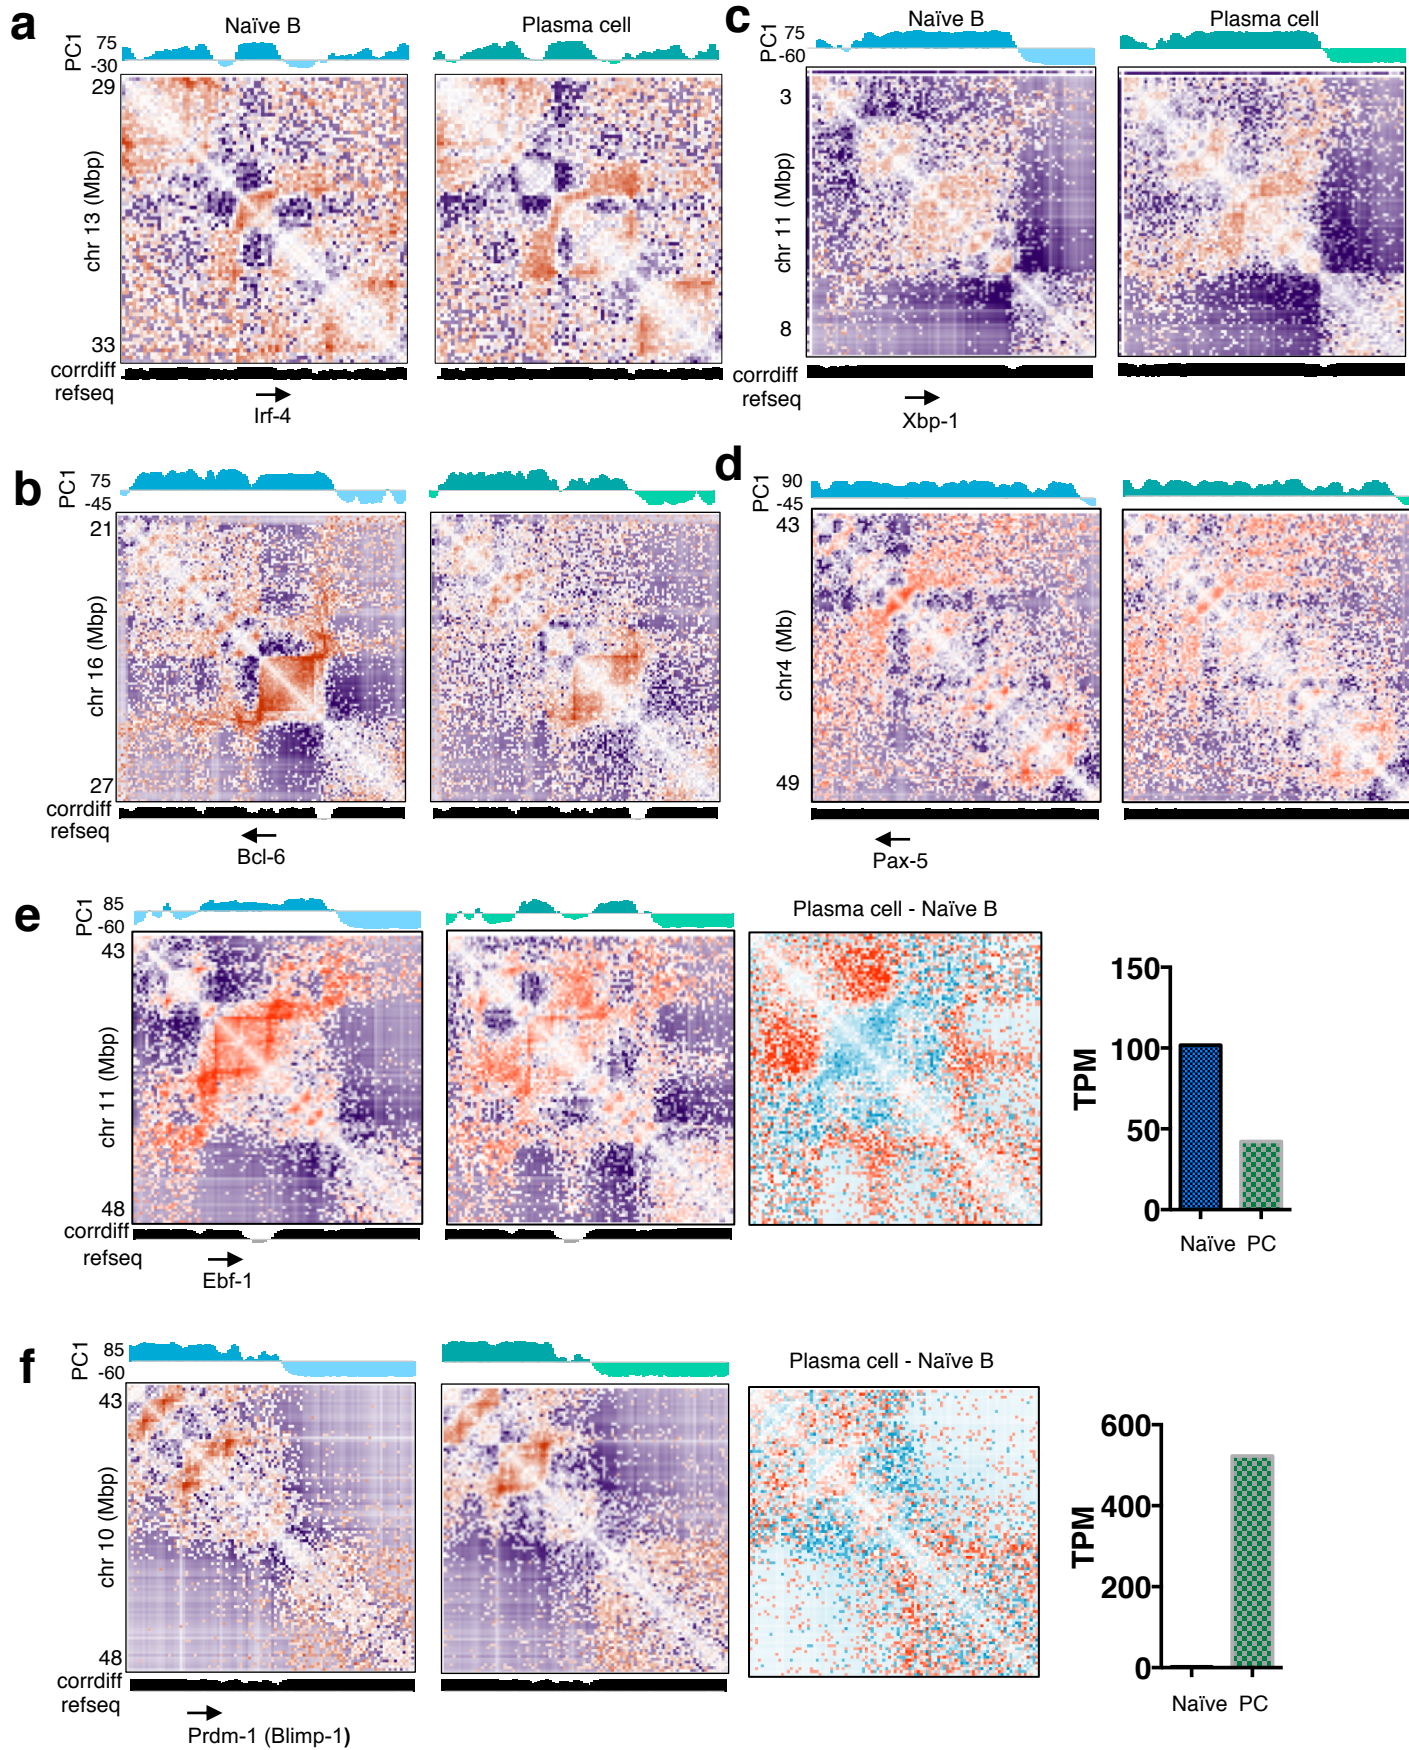

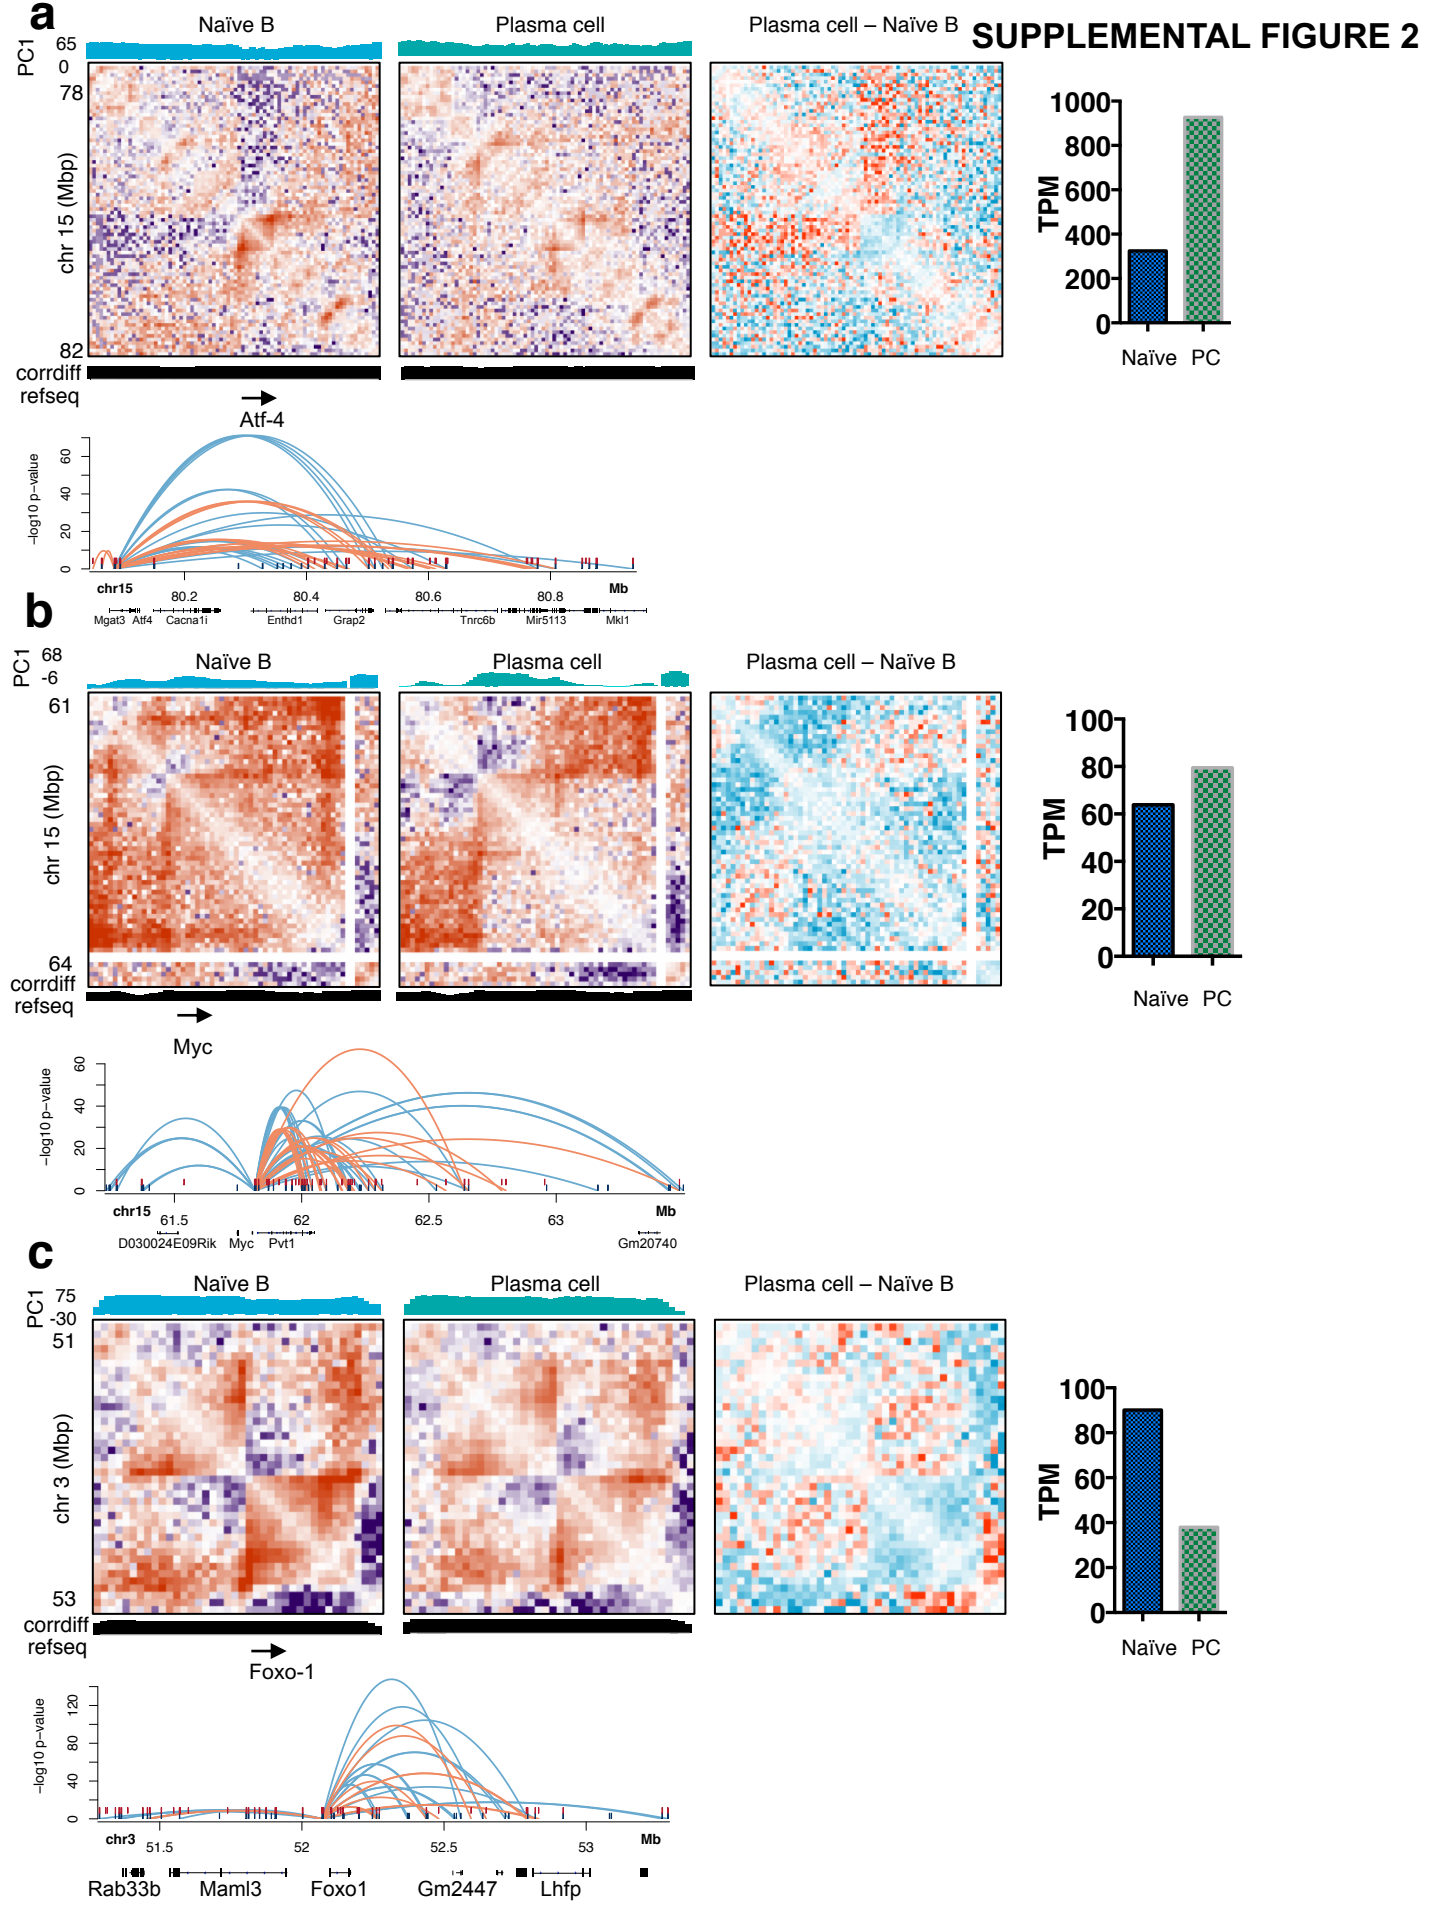

**a**

Naïve B

Plasma cell

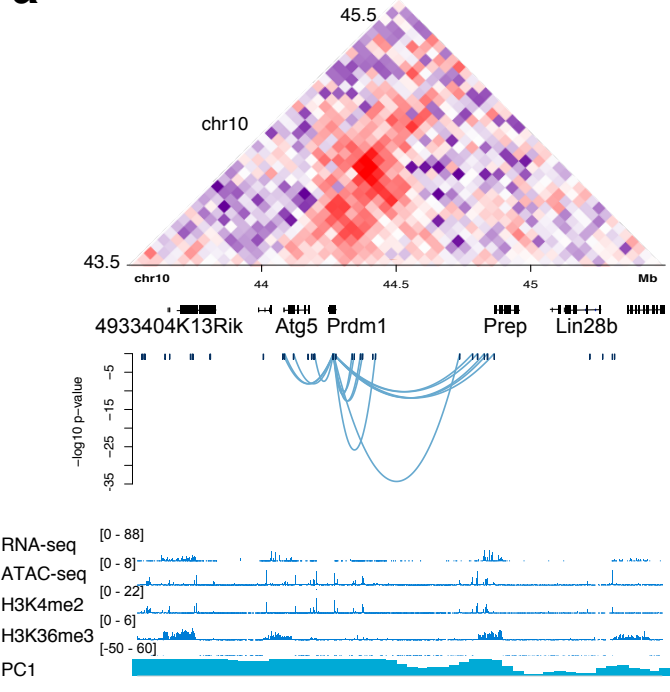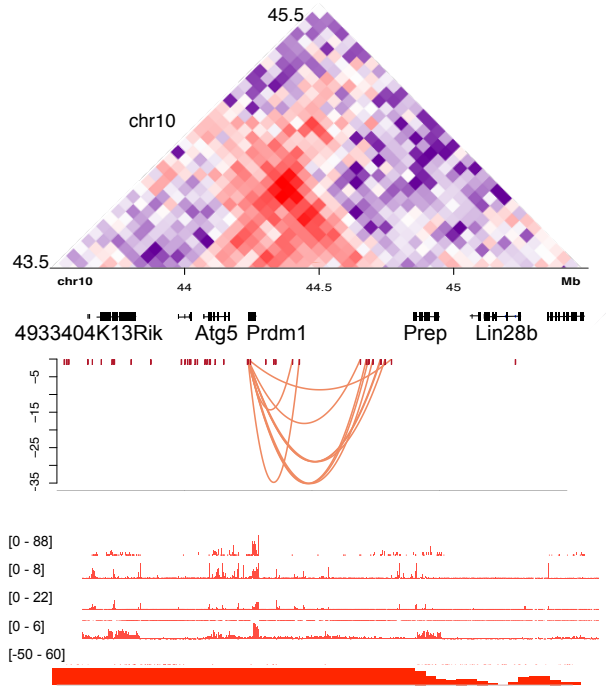

**Supplementary Figure 1.** (a) Contact maps for chromosome 13 from 29 to 33 Mb at 100kb resolution for naïve B cells and plasma cells. (b) Contact maps for chromosome 16 from 21 to 27 Mb at 100kb resolution for naïve B cells and plasma cells. (c) Contact maps for chromosome 11 from 3 to 8 Mb at 100kb resolution for naïve B cells and plasma cells. (d) Contact maps for chromosome 4 from 43 to 49 Mb at 100kb resolution for naïve B cells and plasma cells. (e) Contact maps for chromosome 11 from 43 to 48 Mb at 100kb resolution for naïve B cells and plasma cells (left). RNA level of *Ebf1* in naïve B cells and plasma cells (right). (f) Contact maps for chromosome 10 from 43 to 48 Mb at 100kb resolution for naïve B cells and plasma cells (left). RNA level of *Prdm1* in naïve B cells and plasma cells (right).

**Supplementary Figure 2.** (a) Contact maps for chromosome 15 from 78 to 82 Mb at 100kb resolution for naïve B cells and plasma cells (left). RNA level of *Atf4* in naïve B cells and plasma cells (right). Sushi plot zooming in on the *Atf4* locus from 80.0 to 80.9 Mb (bottom). (b) Contact maps for chromosome 15 from 61 to 64 Mb at 100kb resolution for naïve B cells and plasma cells (left). RNA level of *Myc* in naïve B cells and plasma cells (right). Sushi plot zooming in on the *Myc* locus from 61.2 to 63.5 Mb (bottom). (c) Contact maps for chromosome 3 from 51 to 53 Mb at 100kb resolution for naïve B cells and plasma cells (left). RNA level of *Foxo1* in naïve B cells and plasma cells (right). Sushi plot zooming in on the *Foxo1* locus from 51.2 to 53.3 Mb (bottom).

**Supplementary Figure 3.** (a) Contact map for chromosome 10 from 43.5 to 45.5 Mb at 100 kb resolution. Gene tracks from refseq. Sushi plot showing the interaction between the *Prdm1* promoter and ATAC peaks in the target region. IGV tracks of RNA-seq, ATAC-seq, H3K4me2, and H3K36me3 for naïve B cells (left) or plasma cells (right).
